# Supplementary material
Source: bioRxiv or medRxiv preprint supplement (https://www.biorxiv.org/highwire/filestream/36702/field_highwire_adjunct_files/11/125211-7.pdf)

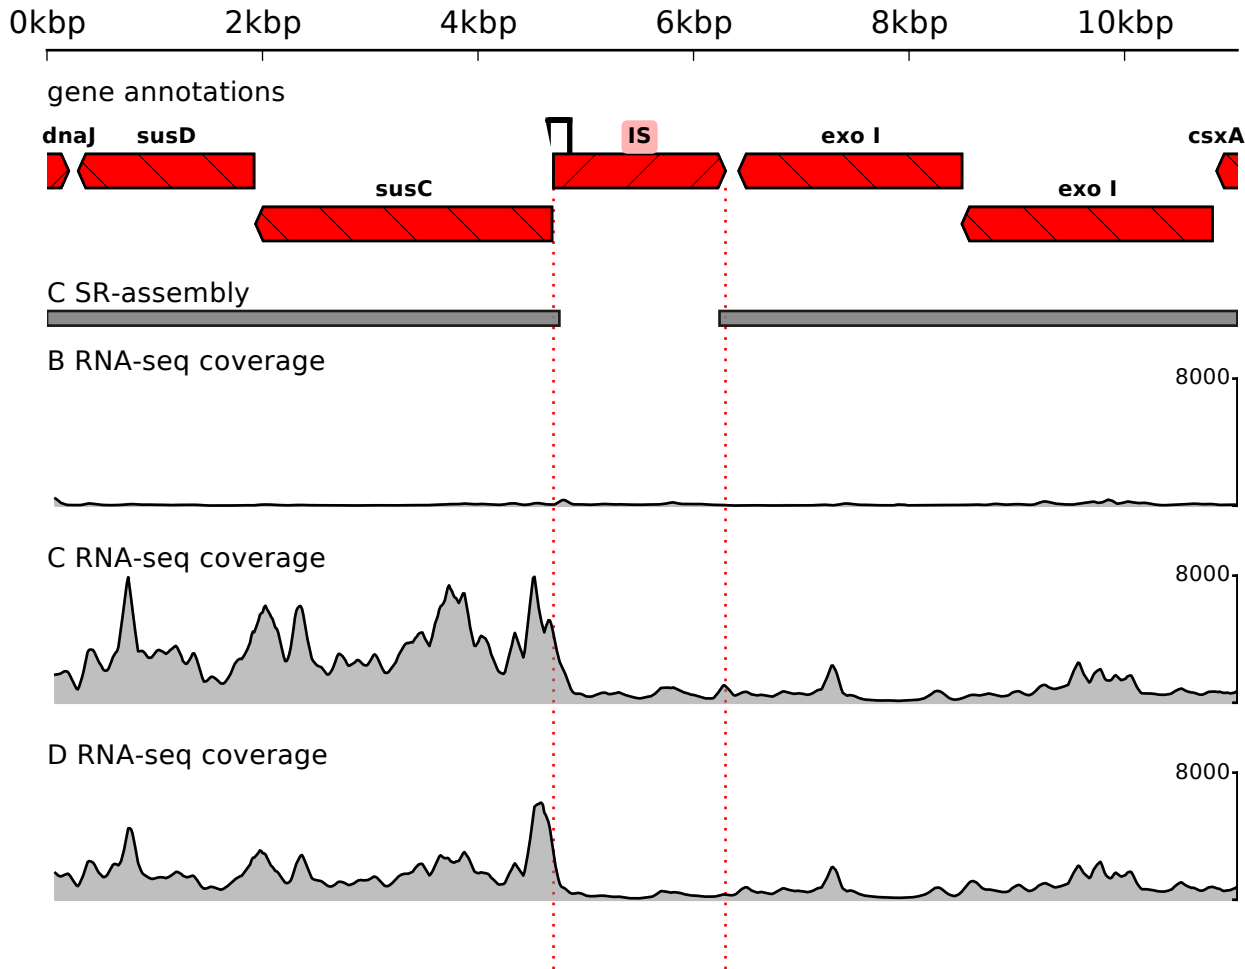

Supplement: Supplementary file [file 125211-7.pdf]
